# Supplementary material
Source: publisher figshare collection journal article supplement (https://karger.figshare.com/articles/dataset/_/5124121)
Supplement: Supplementary file 1 [file 1]

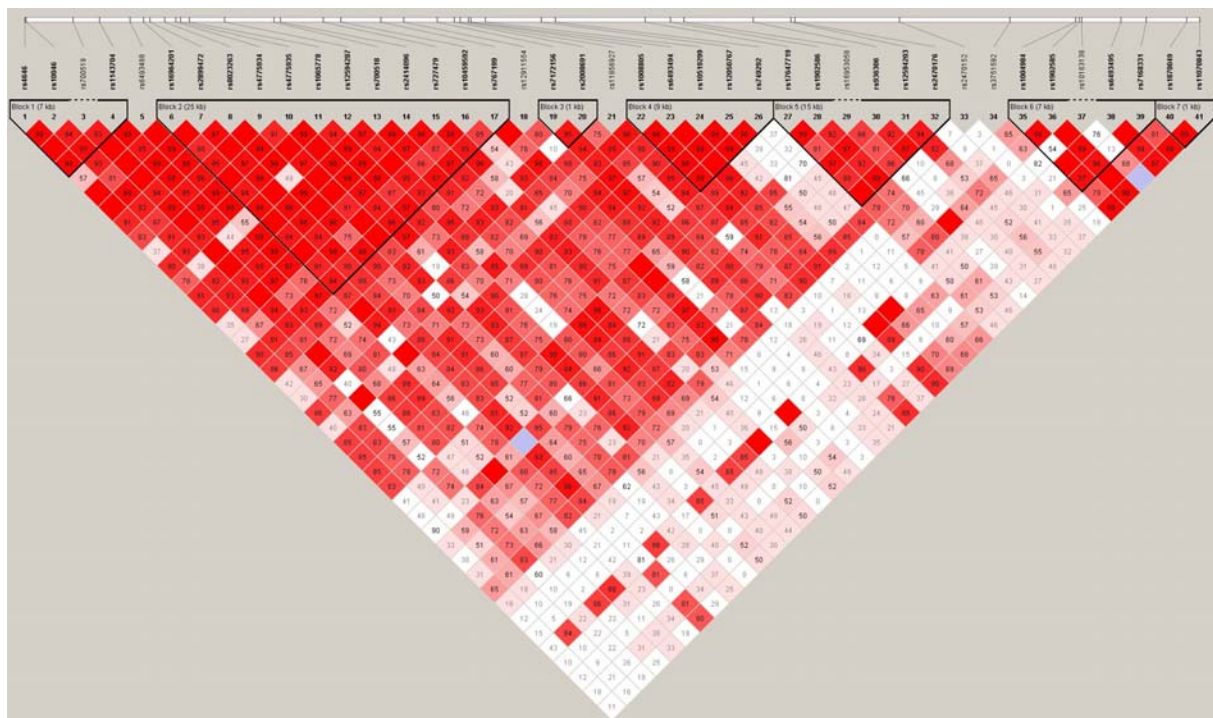

**Supplementary Figure 1. *CYP19* LD plot, predominantly Caucasian AIMs-defined ancestry**

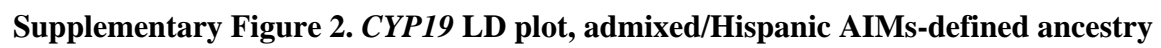

**Supplementary Figure 2. *CYP19* LD plot, admixed/Hispanic AIMS-defined ancestry**

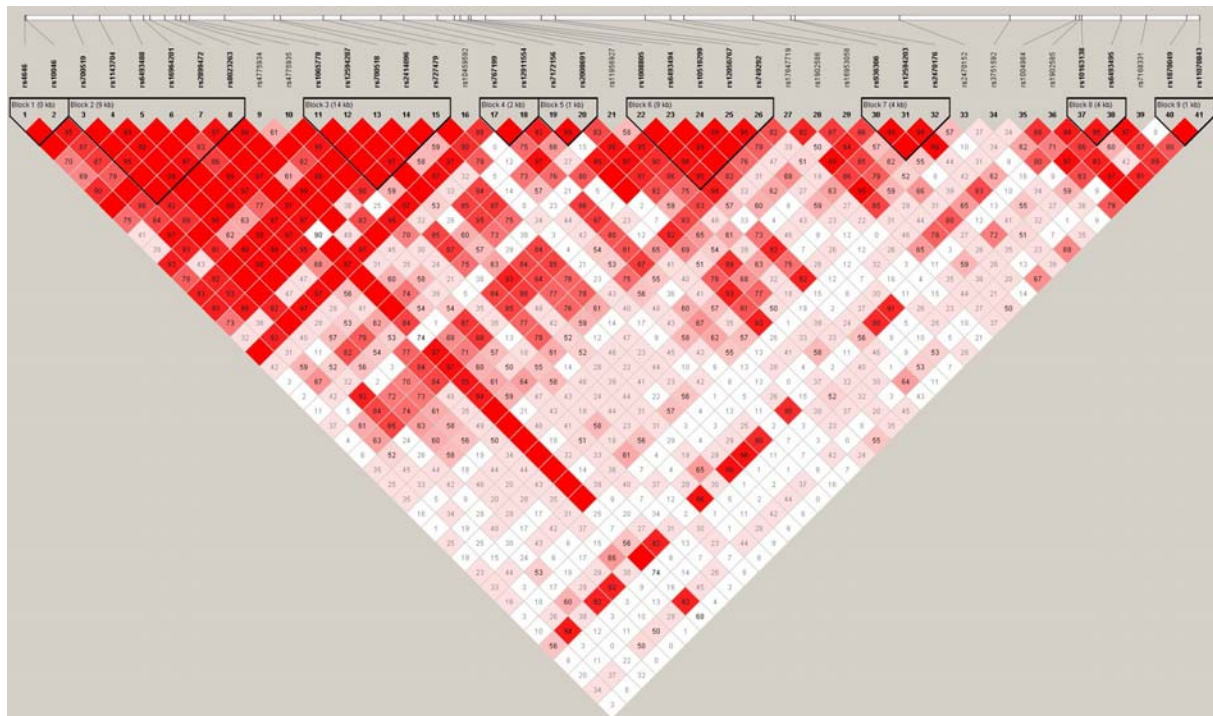

**Supplementary Figure 3. *CYP19* LD plot, predominantly African AIMS-defined ancestry**

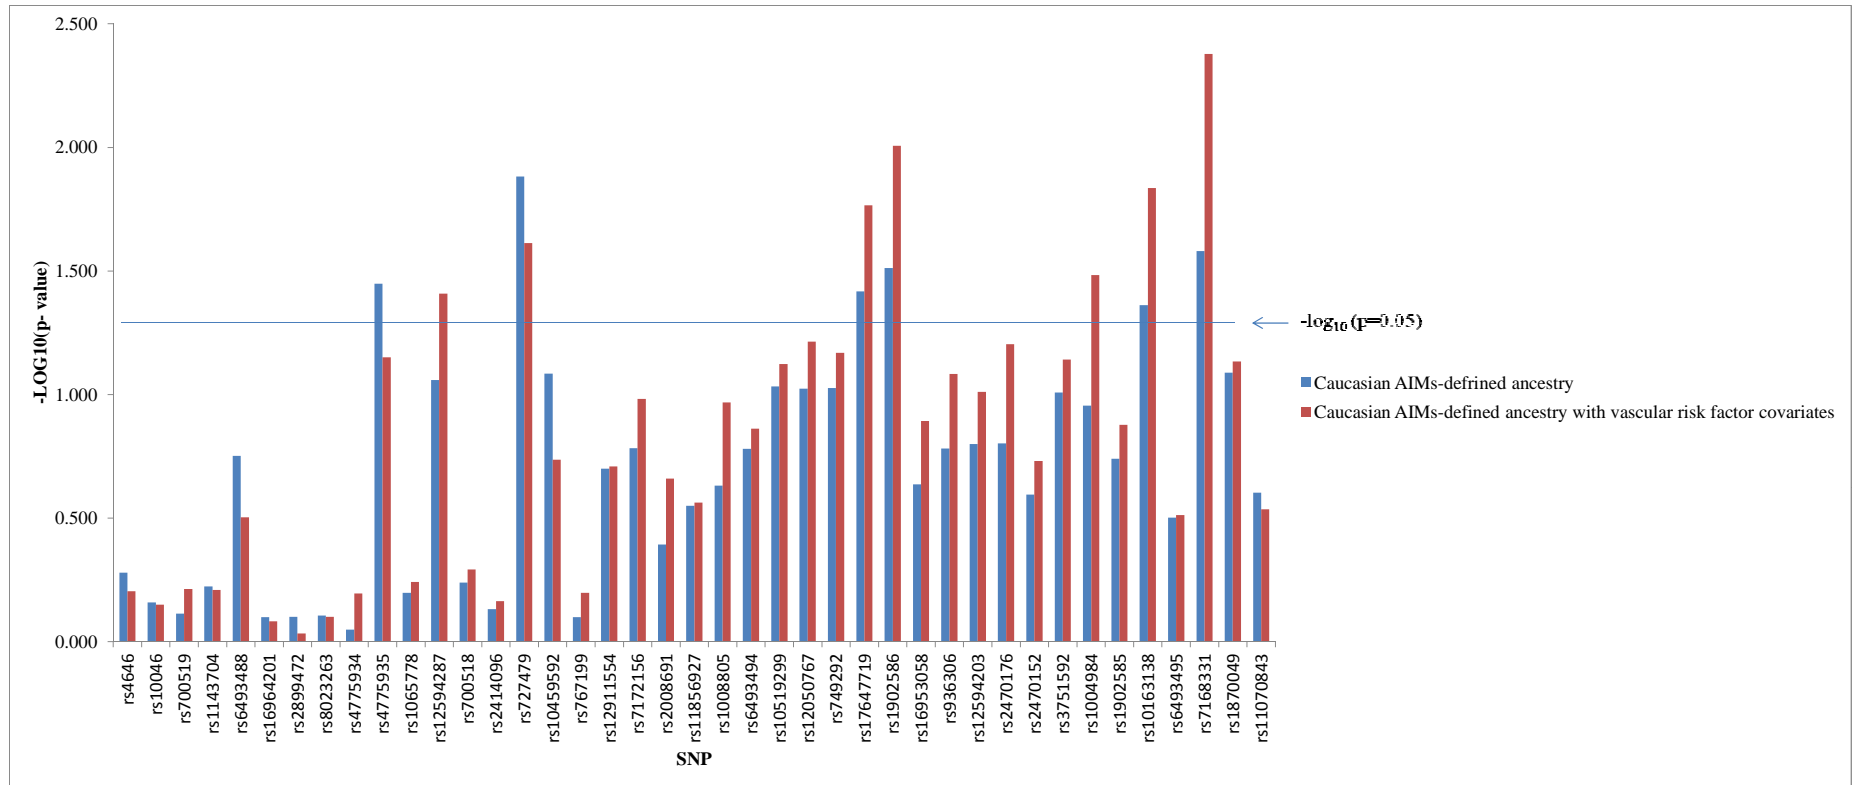

**Supplementary Figure 4. Significant SNPs in women of predominantly Caucasian AIMS-defined ancestry, with and without vascular covariates**

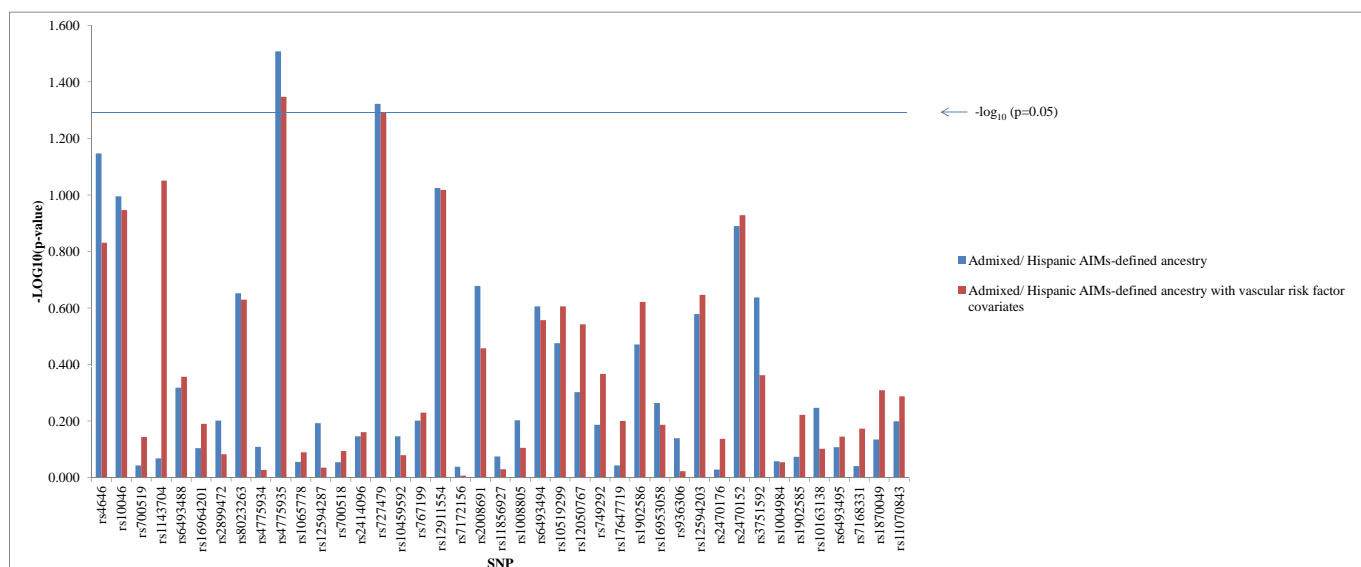

**Supplementary Figure 5. Significant SNPs in women of admixed/ Hispanic AIMs-defined ancestry, with and without vascular covariates**

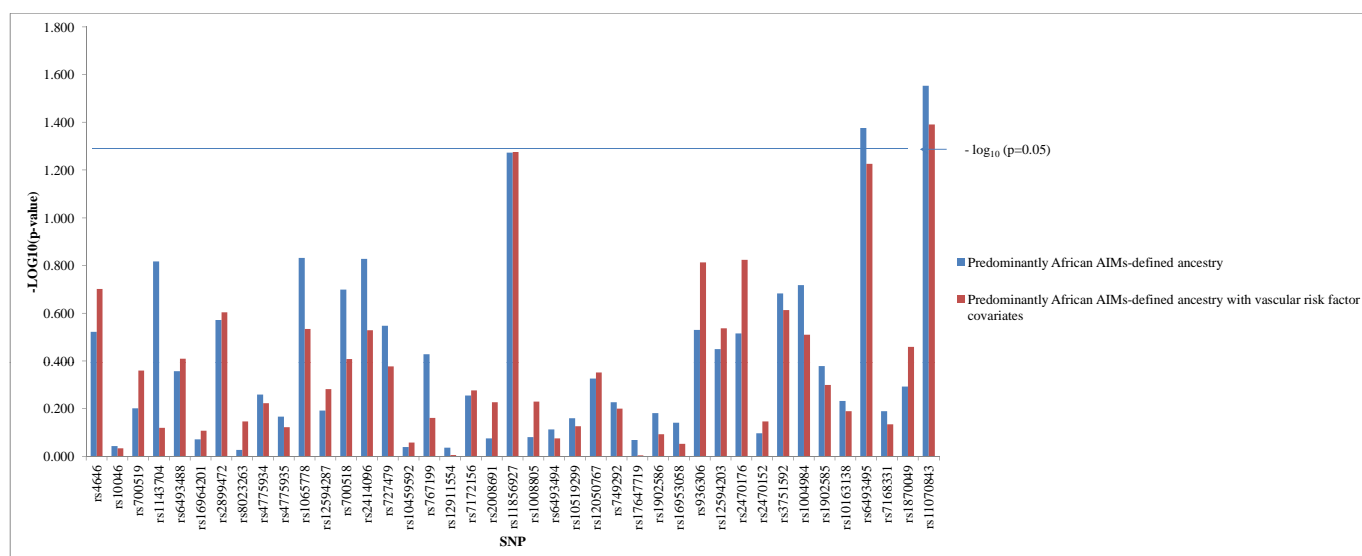

**Supplementary Figure 6. Significant SNPs in women of predominantly African AIMs-defined ancestry, with and without vascular covariates**

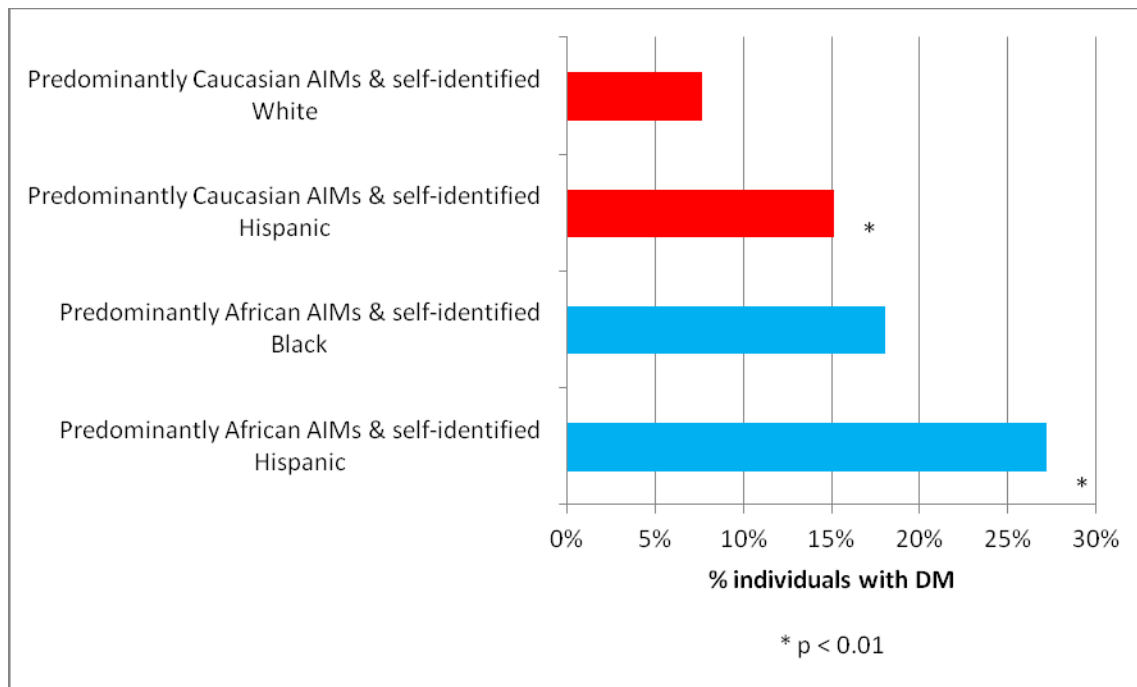

**Supplementary Figure 7. Proportion of AIMs-defined and self-identified ethnicity subgroups with history of diabetes mellitus**
